# Supplementary material
Source: PubMed Central journal article supplement (PMC1664707)
Supplement: pcbi.0020154.sd001.pdf [file pcbi.0020154.sd001.pdf]

# Supplementary Material

## The Kalman filter

The Kalman filter is an algorithm, used widely in engineering navigation and guidance systems, developed to detect and separate signals in the presence of random, unwanted noise [1, 2]. Here we present the continuous-time version of the Kalman filter (the Kalman-Bucy filter) as described in [3].

Consider a linear system with state  $x(t)$  and measurement  $y(t)$ :

$$\dot{x}(t) = Fx(t) + Bu(t) + Gw(t) \quad (1)$$

$$y(t) = Hx(t) + Du(t) + v(t) \quad (2)$$

where  $x(t)$ ,  $u(t)$ ,  $w(t)$ , and  $v(t)$  are vectors of known dimensions and the matrices  $F, B, H, D$  and  $G$  have dimensions corresponding to the vector dimensions. The process noise  $w(t)$  and measurement noise  $v(t)$  are assumed zero-mean white noise processes with  $E[w(t)] = 0$ ,  $E[v(t)] = 0$ ,  $E[w(t)w^\top(\tau)] = Q\delta(t - \tau)$ ,  $E[v(t)v^\top(\tau)] = R\delta(t - \tau)$ , and  $E[w(t)v^\top(\tau)] = 0$ . The covariance matrices  $Q$  and  $R$  are positive semidefinite and definite, respectively. We would like to obtain an estimate  $\hat{x}$  of  $x$  given the observation  $y$ . This optimal estimator is given by the Kalman Filter:

$$\dot{\hat{x}} = F\hat{x} + Bu + K(y - H\hat{x} - Du),$$

where  $K = PH^\top R^{-1}$  is the Kalman gain matrix and the initial state is  $\hat{x}_0 = E[x(t_0)]$ . Note that  $\hat{x}$  follows the same dynamics as  $x$  adjusted by the innovation gained from comparing the current estimate of the output with the actual measurement. The covariance matrix  $P$  is governed by the matrix Riccati differential equation

$$\dot{P} = FP + PF^\top - PH^\top R^{-1}HP + GQG^\top,$$

and is initialized with  $P(t_0) = E[(x(t_0) - E[x(t_0)])(x(t_0) - E[x(t_0)])^\top]$ . Solving  $\dot{P} = 0$  yields the steady-state filter.

If we have the simple scalar system  $\dot{x} = w$ ,  $y = x + v$ , then solving the steady-state Riccati equation yields  $P^2 = QR$  and  $K = \sqrt{Q/R}$ . The Kalman estimator is then

$$\dot{\hat{x}} = \sqrt{\frac{Q}{R}}(y - \hat{x}).$$

This is a low pass filter with bandwidth equal to the signal-to-noise ratio  $Q/R$  as seen by obtaining the transfer function from  $y$  to  $\hat{x}$ :

$$\frac{\hat{X}(s)}{Y(s)} = \frac{\sqrt{Q/R}}{s + \sqrt{Q/R}}.$$

## References

- [1] Kalman RE (1960) A new approach to linear filtering and prediction problems. Trans ASME J Basic Eng Series D 82:35–46.
- [2] Kalman RE, Bucy R (1961) New results in linear filtering and prediction theory. Trans ASME J Basic Eng Series D 83:95–108.
- [3] Mendel JM (1995) Lessons in Estimation Theory for Signal Processing, Communications, and Control. Upper Saddle River, N.J.: Prentice Hall.
