# Supplementary material
Source: PubMed Central journal article supplement (PMC1664707)

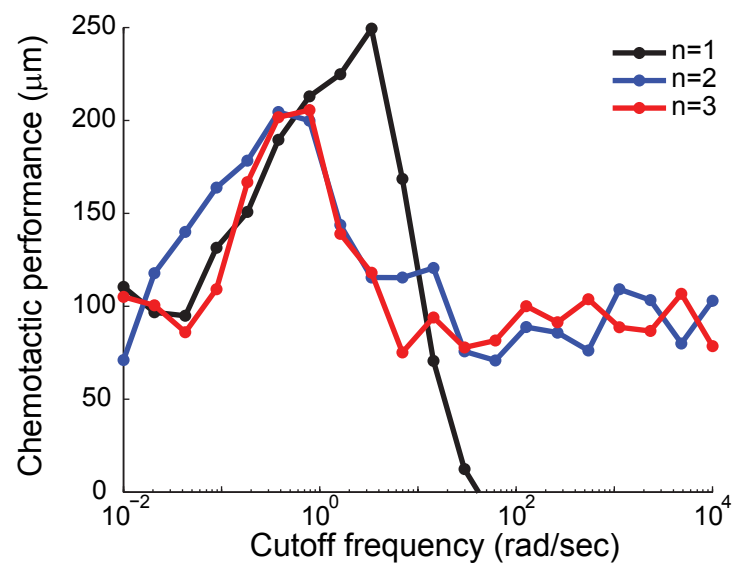

Supplement: pcbi.0020154.sg001.pdf [file pcbi.0020154.sg001.pdf]
